# Supplementary material for: Kombucha Tea-associated microbes remodel host metabolic pathways to suppress lipid accumulation
Source: PLoS Genet. 2024 Mar 28;20(3):e1011003. doi: 10.1371/journal.pgen.1011003 (PMC10977768; doi:10.1371/journal.pgen.1011003)
Supplement: S2 Data — (XLSX) [file pgen.1011003.s015.xlsx]

## Sheet: F2B
Food	Worm	Area	Mean	Min	Max	Inverted Mean		Food	Worm	Area	Mean	Min	Max	Inverted Mean		Food	Worm	Area	Mean	Min	Max	Inverted Mean		Food	Worm	Area	Mean	Min	Max	Inverted Mean
E. coli OP50	1	69978	2462.69	977	5102	63073.3		E. coli HT115	1	75777	2391.92	986	5233	63144.1		KTM	1	43584	2758.11	907	5008	62777.9		A. tropicalis	1	58473	1869.62	829	4299	63666.4
E. coli OP50	2	64254	2203.6	810	4959	63332.4		E. coli HT115	2	64269	2372.92	905	5058	63163.1		KTM	2	54813	2344.99	755	4915	63191		A. tropicalis	2	69582	1879.67	819	4790	63656.3
E. coli OP50	3	69604	2279.39	793	4931	63256.6		E. coli HT115	3	63465	2326.47	845	4838	63209.5		KTM	3	45201	2604.95	1050	4901	62931		A. tropicalis	3	75516	1888.44	777	4793	63647.6
E. coli OP50	4	70826	2379.3	793	5206	63156.7		E. coli HT115	4	51144	2295.87	917	4764	63240.1		KTM	4	45756	2678.18	989	4877	62857.8		A. tropicalis	4	42726	2022.13	894	4486	63513.9
E. coli OP50	5	73776	2060.89	699	4925	63475.1		E. coli HT115	5	60681	2001.14	885	4498	63534.9		KTM	5	71985	2785.89	962	4684	62750.1		A. tropicalis	5	40725	2353.21	1120	4884	63182.8
E. coli OP50	6	79440	2329.23	741	5358	63206.8		E. coli HT115	6	71949	2264.98	862	4563	63271		KTM	6	51966	2588.36	962	4701	62947.6		A. tropicalis	6	67437	1754.5	680	4595	63781.5
E. coli OP50	7	61778	1881.74	693	4555	63654.3		E. coli HT115	7	71115	2463.22	1063	4610	63072.8		KTM	7	66278	2740.15	962	4676	62795.8		A. tropicalis	7	84714	1884.2	672	4952	63651.8
E. coli OP50	8	67414	2282.09	737	5247	63253.9		E. coli HT115	8	65304	2353.33	936	4945	63182.7		KTM	8	45496	2517.53	920	4810	63018.5		A. tropicalis	8	85416	2403.74	834	4991	63132.3
E. coli OP50	9	79080	2549.12	886	5600	62986.9		E. coli HT115	9	57966	2350.83	977	5387	63185.2		KTM	9	50084	2402.76	738	5102	63133.2		A. tropicalis	9	78378	1924.33	715	4868	63611.7
E. coli OP50	10	90866	2453.48	784	5504	63082.5		E. coli HT115	10	77535	2284.74	841	5015	63251.3		KTM	10	44922	2506.09	875	4633	63029.9		A. tropicalis	10	72372	1756.54	713	4672	63779.5
E. coli OP50	11	76464	2219.09	789	5307	63316.9		E. coli HT115	11	84759	2636.41	908	4948	62899.6		KTM	11	51832	2347.61	660	4931	63188.4		A. tropicalis	11	82635	2256.74	904	4588	63279.3
E. coli OP50	12	69614	2068.75	751	5225	63467.3		E. coli HT115	12	75681	2329.59	861	4696	63206.4		KTM	12	51940	2614.59	965	4780	62921.4		A. tropicalis	12	84501	2291.22	860	4697	63244.8
E. coli OP50	13	72978	2439.24	874	5180	63096.8		E. coli HT115	13	73170	2338.32	955	4893	63197.7		KTM	13	49922	1932.48	704	4612	63603.5		A. tropicalis	13	92427	1983.66	780	4799	63552.3
E. coli OP50	14	59278	2350.37	912	4999	63185.6		E. coli HT115	14	72324	2275.76	880	4840	63260.2		KTM	14	28490	2467.55	998	4709	63068.4		A. tropicalis	14	66765	1966.18	750	4678	63569.8
E. coli OP50	15	67620	2116.13	839	4593	63419.9		E. coli HT115	15	74619	2240.17	773	4739	63295.8		KTM	15	51936	2775.49	1039	5099	62760.5		A. tropicalis	15	77703	2221.47	935	4691	63314.5
E. coli OP50	16	71768	2105.59	757	4557	63430.4		E. coli HT115	16	75228	2815.3	889	5290	62720.7		KTM	16	48236	2590.19	963	4528	62945.8		A. tropicalis	16	72933	1905.68	809	4794	63630.3
E. coli OP50	17	60260	2066.49	749	4440	63469.5		E. coli HT115	17	78999	2534.22	1006	5500	63001.8		KTM	17	45506	2624.51	932	4711	62911.5		A. tropicalis	17	71133	1877.55	744	5006	63658.5
E. coli OP50	18	80026	2365.73	657	4839	63170.3		E. coli HT115	18	65034	2364.95	990	5502	63171.1		KTM	18	50876	2769.76	1105	4961	62766.2		A. tropicalis	18	69078	2089.03	745	4846	63447
E. coli OP50	19	76174	2458.86	873	5090	63077.1		E. coli HT115	19	87270	2519.29	959	5004	63016.7		KTM	19	56342	2769.5	1108	5053	62766.5		A. tropicalis	19	90282	2131.69	754	5148	63404.3
E. coli OP50	20	71628	2205.39	833	5027	63330.6		E. coli HT115	20	64857	2611.54	1050	4956	62924.5		KTM	20	44326	2745.65	1054	4790	62790.3		A. tropicalis	20	64554	2049.12	745	4876	63486.9
E. coli OP50	21	78004	2205.06	679	5005	63330.9		E. coli HT115	21	80544	2350.03	1038	4601	63186		KTM	21	40808	2872.27	1132	5042	62663.7		A. tropicalis	21	74628	1672.82	644	4679	63863.2
E. coli OP50	22	79044	2216.86	893	4596	63319.1		E. coli HT115	22	68148	2074.53	703	4685	63461.5		KTM	22	56248	3104.01	1120	5270	62432		A. tropicalis	22	75312	1994.04	732	5308	63542
E. coli OP50	23	74998	2097.94	803	4416	63438.1		E. coli HT115	23	78588	2531.72	884	4610	63004.3		KTM	23	49944	3045.95	1057	4959	62490		A. tropicalis	23	71595	1694.69	668	4502	63841.3
E. coli OP50	24	64518	2040.2	782	4602	63495.8		E. coli HT115	24	75297	2225.85	982	5010	63310.2		KTM	24	55706	2816.84	986	4795	62719.2		A. tropicalis	24	87594	1816.25	669	4605	63719.8
E. coli OP50	25	75274	2328.74	924	4975	63207.3		E. coli HT115	25	102471	2301.3	887	5107	63234.7		KTM	25	51712	2698.22	1072	4670	62837.8		A. tropicalis	25	82122	1983.85	740	4678	63552.1
E. coli OP50	26	73538	2258.61	696	4653	63277.4		E. coli HT115	26	70455	2524.92	848	5139	63011.1		KTM	26	41572	2653.84	902	4713	62882.2		A. tropicalis	26	74220	1748.53	711	4625	63787.5
E. coli OP50	27	61534	1878.1	789	4382	63657.9		E. coli HT115	27	71619	2503.2	1018	5259	63032.8		KTM	27	43762	2965.51	938	5424	62570.5		A. tropicalis	27	77832	1667.38	678	4516	63868.6
E. coli OP50	28	70638	1977.14	831	4328	63558.9		E. coli HT115	28	68451	2583.54	1056	4971	62952.5		KTM	28	50290	2774.42	1154	4896	62761.6		A. tropicalis	28	84894	2002.34	805	4705	63533.7
E. coli OP50	29	72160	2062.65	751	4530	63473.4		E. coli HT115	29	61860	2463.69	893	4727	63072.3		KTM	29	43536	2571.64	1066	4699	62964.4		A. tropicalis	29	71814	1930.62	771	4878	63605.4
E. coli OP50	30	68682	2102.88	782	4572	63433.1		E. coli HT115	30	70149	2484.59	955	4973	63051.4		KTM	30	40068	2501.4	782	4658	63034.6		A. tropicalis	30	79923	2215.51	770	5124	63320.5
E. coli OP50	31	72214	2369.2	891	5056	63166.8		E. coli HT115	31	62904	2408.49	896	4795	63127.5		KTM	31	40148	2508.1	917	4556	63027.9		A. tropicalis	31	68325	1823.69	668	4897	63712.3
E. coli OP50	32	68624	2189.56	694	5135	63346.4		E. coli HT115	32	76617	2354.82	814	4821	63181.2		KTM	32	48736	2762.64	1063	5072	62773.4		A. tropicalis	32	69093	2038.86	805	5094	63497.1
E. coli OP50	33	74078	2206.88	782	4933	63329.1		E. coli HT115	33	79180	2544.5	1035	4659	62991.5		KTM	33	53708	3034.66	1065	5319	62501.3		A. tropicalis	33	71679	2057.43	736	5062	63478.6
E. coli OP50	34	81108	2223.73	760	4714	63312.3		E. coli HT115	34	70906	2140.7	905	4456	63395.3		KTM	34	49982	2813.77	926	4853	62722.2		A. tropicalis	34	79725	2399.17	925	4970	63136.8
E. coli OP50	35	78184	2340.81	812	4930	63195.2		E. coli HT115	35	64756	2436.46	920	4724	63099.5		KTM	35	59638	2560.08	1044	4668	62975.9		A. tropicalis	35	71769	1863.35	748	4580	63672.7
E. coli OP50	36	63616	2195.66	870	4802	63340.3		E. coli HT115	36	73664	2328.33	944	4808	63207.7		KTM	36	47488	2834.12	911	5195	62701.9		A. tropicalis	36	64530	2024.89	848	4654	63511.1
E. coli OP50	37	65094	2361.95	848	4764	63174.1		E. coli HT115	37	61858	2888.97	1152	5023	62647		KTM	37	48194	2840.44	986	5338	62695.6		A. tropicalis	37	68400	1812.05	710	4623	63723.9
E. coli OP50	38	66166	1934.34	671	4741	63601.7		E. coli HT115	38	66556	2604.3	1056	5011	62931.7		KTM	38	55560	3114.49	1161	5314	62421.5		A. tropicalis	38	45618	2220.84	963	5181	63315.2
E. coli OP50	39	66518	1927.98	762	4582	63608		E. coli HT115	39	59158	2500.52	893	4800	63035.5		KTM	39	48394	3045.9	1103	5358	62490.1		A. tropicalis	39	81918	2087.99	804	5062	63448
E. coli OP50	40	73966	2345.12	792	4899	63190.9		E. coli HT115	40	76640	2634.03	1048	4936	62902		KTM	40	66798	3068.22	911	5390	62467.8		A. tropicalis	40	65802	2146.23	869	5221	63389.8

## Sheet: F2B Summary Statistics PRISM
Table Analyzed	ORO_R1_D1A_Normalized							Number of families	1
Data sets analyzed	A-D							Number of comparisons per family	6
								Alpha	0.05
ANOVA summary
F	93.22							Tukey's multiple comparisons test	Mean Diff.	95.00% CI of diff.	Below threshold?	Summary	Adjusted P Value
P value	<0.0001							O vs. H	0.003204	0.001387 to 0.005021	Yes	****	<0.0001	A-B
P value summary	****							O vs. K	0.007742	0.005925 to 0.009559	Yes	****	<0.0001	A-C
Significant diff. among means (P < 0.05)?	Yes							O vs. A	-0.003487	-0.005304 to -0.001670	Yes	****	<0.0001	A-D
R squared	0.6419							H vs. K	0.004539	0.002722 to 0.006356	Yes	****	<0.0001	B-C
								H vs. A	-0.00669	-0.008507 to -0.004873	Yes	****	<0.0001	B-D
Brown-Forsythe test								K vs. A	-0.01123	-0.01305 to -0.009412	Yes	****	<0.0001	C-D
F (DFn, DFd)	1.105 (3, 156)
P value	0.3491							Test details	Mean 1	Mean 2	Mean Diff.	SE of diff.	n1	n2	q	DF
P value summary	ns							O vs. H	1	0.9968	0.003204	0.0006997	40	40	6.476	156
Are SDs significantly different (P < 0.05)?	No							O vs. K	1	0.9923	0.007742	0.0006997	40	40	15.65	156
								O vs. A	1	1.003	-0.003487	0.0006997	40	40	7.047	156
Bartlett's test								H vs. K	0.9968	0.9923	0.004539	0.0006997	40	40	9.174	156
Bartlett's statistic (corrected)	5.543							H vs. A	0.9968	1.003	-0.00669	0.0006997	40	40	13.52	156
P value	0.1361							K vs. A	0.9923	1.003	-0.01123	0.0006997	40	40	22.7	156
P value summary	ns
Are SDs significantly different (P < 0.05)?	No
ANOVA table	SS	DF	MS	F (DFn, DFd)	P value
Treatment (between columns)	0.002738	3	0.0009127	F (3, 156) = 93.22	P<0.0001
Residual (within columns)	0.001527	156	9.791e-06
Total	0.004265	159
Data summary
Number of treatments (columns)	4
Number of values (total)	160

## Sheet: F2D
Food	Worm	Area	Mean	StdDev	Mode	Min	Max	IntDen	Median	RawIntDev		Food	Worm	Area	Mean	StdDev	Mode	Min	Max	IntDen	Median	RawIntDev		Food	Worm	Area	Mean	StdDev	Mode	Min	Max	IntDen	Median	RawIntDev		Food	Worm	Area	Mean	StdDev	Mode	Min	Max	IntDen	Median	RawIntDev
E. coli OP50	1	50203.6	4349.48	2032.43	1570	1228	12320	2.18359e+08	4274	82692220		E. coli HT115	1	59326.9	3667.99	1728.36	1475	1023	14048	2.1761e+08	3485	82408623		KTM	1	41051.2	1868.39	549.214	1645	1269	5166	7.66996e+07	1716	29045993		A. tropicalis	2	90306.7	4881.05	2546.83	1631	1250	18118	4.40792e+08	4448	166927056
E. coli OP50	2	59878.8	5479.68	2619.42	1631	1313	13901	3.28117e+08	5465	124257296		E. coli HT115	2	64103.8	3826.52	1796.4	1382	1091	11956	2.45295e+08	3663	92892648		KTM	2	34016.5	1805.16	435.34	1593	1231	4235	6.14054e+07	1674	23254100		A. tropicalis	3	91220.4	4794.06	2556.84	1763	1260	19585	4.37316e+08	4290	165610622
E. coli OP50	3	69292.6	5934.22	3176.34	1826	1305	16350	4.11197e+08	5708	155719751		E. coli HT115	3	63715.6	3342.7	1565.38	2049	1010	10643	2.12982e+08	2988	80655981		KTM	3	44858.9	1968.37	600.479	1614	1137	5341	8.8299e+07	1738	33438679		A. tropicalis	4	88685.4	5137.49	2814.51	1684	1156	26021	4.5562e+08	4744	172542604
E. coli OP50	4	63736.8	5066.43	2731.12	1804	1273	17017	3.22918e+08	4645	122288489		E. coli HT115	4	69540.9	3680.87	1737.65	1547	1076	12648	2.55971e+08	3501	96935620		KTM	4	46456.5	2058.39	645.248	1607	1180	5415	95625439	1821	36213184		A. tropicalis	5	88384.4	5352.62	2697.41	3494	1154	24051	4.73088e+08	4953	179157531
E. coli OP50	5	65825.5	4905.7	2418.12	1814	937	13320	3.2292e+08	4866	122289414		E. coli HT115	5	51875.1	3997.25	1811.83	1560	1260	12405	2.07358e+08	3795	78525970		KTM	5	41703.4	1613.26	221.657	1514	1174	2623	6.72784e+07	1562	25478196		A. tropicalis	6	74386.4	5620.54	2728.98	3272	1219	22400	4.18092e+08	5264	158330649
E. coli OP50	6	67296.3	4425.42	2285.41	1610	1282	12738	2.97814e+08	4283	112781739		E. coli HT115	6	63000	4273.91	2050.24	1652	1202	13389	2.69256e+08	4049	101966909		KTM	6	29667.4	1654.36	355.625	1619	1093	4106	4.90807e+07	1569	18586760		A. tropicalis	7	86058	4898.36	2505.3	1837	1314	20318	4.21543e+08	4614	159637541
E. coli OP50	7	56596.5	5427.14	2869.29	1828	1327	16601	3.07157e+08	4859	116319882		E. coli HT115	7	57544.5	3631.96	1703.69	1527	1071	11572	2.08999e+08	3370	79147716		KTM	7	35350	1870.27	495.316	1611	1241	4623	66113983	1709	25037248		A. tropicalis	8	89812.9	5181.51	2765.3	1598	1153	20551	4.65367e+08	4876	176233505
E. coli OP50	8	61737.8	5014.84	2651.47	1782	1384	14767	3.09605e+08	4889	117247024		E. coli HT115	8	61885.7	3862.28	1713.95	1574	1072	11653	2.3902e+08	3720	90516276		KTM	8	28481.8	1755.44	493.53	1555	1069	4333	4.9998e+07	1614	18934169		A. tropicalis	9	60277.5	3789.56	1439.87	1818	1336	9972	2.28425e+08	3798	86504266
E. coli OP50	9	59253	5050.23	2472.93	1782	1382	13007	2.99241e+08	4653	113322032		E. coli HT115	9	55318.5	3659.39	1697.24	1652	1080	11980	2.02432e+08	3382	76660491		KTM	9	38151.8	1813.21	521.079	1517	1051	4272	6.91772e+07	1640	26197275		A. tropicalis	10	90211.7	4760.86	2237.08	1774	1258	15450	4.29485e+08	4608	162645380
E. coli OP50	10	64983.1	5002.58	2676.88	1632	1270	15662	3.25083e+08	4752	123108541		E. coli HT115	10	64014	4272.78	1989.56	1651	1206	14127	2.73518e+08	4111	103580798		KTM	10	37829.6	2209.31	708.256	1780	1272	5542	8.35772e+07	1925	31650531		A. tropicalis	11	59371.8	3609.14	1405.69	1562	1177	9742	2.14281e+08	3633	81147845
E. coli OP50	11	57467.9	4919.14	2513.41	1702	1298	13865	2.82693e+08	4799	107055293		E. coli HT115	11	61149	3368.98	1496.62	1611	1286	13806	2.0601e+08	3107	78015507		KTM	11	45426.7	2360.76	837.532	1849	1259	6911	1.07241e+08	2018	40612099		A. tropicalis	12	88804.2	4720.22	2252.05	1667	1194	15892	4.19176e+08	4562	158741074
E. coli OP50	12	53694.5	4482.54	2179.46	1618	1270	12931	2.40687e+08	4313	91147925		E. coli HT115	12	55933.7	4091.24	1940.08	1626	1276	12896	2.28839e+08	3749	86660742		KTM	12	42466.5	2289.65	732.536	1781	1287	6844	97233643	1970	36822208		A. tropicalis	13	90404.4	4461.32	2472.55	1622	787	17779	4.03323e+08	4134	152737684
E. coli OP50	13	65482.2	5201.5	2584.35	1934	1364	15109	3.40606e+08	5065	128986854		E. coli HT115	13	60660.4	4143.93	1988.05	1571	1250	13026	2.51372e+08	3888	95194266		KTM	13	43425.1	2272.94	761.636	1823	1283	5882	9.87027e+07	1947	37378552		A. tropicalis	14	82392.8	4336.57	2039.05	1540	1167	13840	3.57302e+08	4171	135309522
E. coli OP50	14	67087.7	5592.23	2981.36	1796	1384	14838	3.7517e+08	5307	142076131		E. coli HT115	14	76707.5	3824.2	1712.91	1649	1202	14467	2.93345e+08	3610	111089143		KTM	14	47679.1	2149.02	673.787	1721	1252	5740	1.02463e+08	1878	38802644		A. tropicalis	15	90615.7	4997.27	2553.17	1659	1308	20237	4.52831e+08	4718	171486154
E. coli OP50	15	62017.7	5513.91	2852.69	1606	1278	16526	3.4196e+08	5508	129499746		E. coli HT115	15	66409.1	4244.78	1938.68	1627	1280	13564	2.81892e+08	4092	106752040		KTM	15	40047.7	1886.52	639.365	1651	1149	5631	7.55508e+07	1667	28610940		A. tropicalis	16	93874.2	4863.34	2460.43	1783	1291	20661	4.56543e+08	4615	172891888
E. coli OP50	16	65474.3	5136.87	2811.46	1627	1334	16050	3.36333e+08	4907	127368586		E. coli HT115	16	56123.8	4057.61	2009.66	1699	1282	16684	2.27728e+08	3636	86240335		KTM	16	36570	1988.27	666.043	1787	1225	5479	7.2711e+07	1751	27535516		A. tropicalis	17	74470.9	5272.96	2309.39	4983	1138	18639	3.92682e+08	5059	148708137
E. coli OP50	17	62295	5217.69	2718.4	1570	1269	16001	3.25036e+08	4818	123090582		E. coli HT115	17	49601.5	4162.96	1871.61	1646	1276	13390	2.06489e+08	3989	78197112		KTM	17	43868.7	2036.94	730.546	1530	1091	5622	8.93581e+07	1734	33839768		A. tropicalis	18	76850.1	5119.29	2376.67	4450	1107	17219	3.93418e+08	5002	148986660
E. coli OP50	18	59126.2	5009.21	2549.38	1681	1255	14696	2.96176e+08	4775	112161225		E. coli HT115	18	72332	4633.73	2247.74	1661	1248	17946	3.35167e+08	4546	126927024		KTM	18	46366.7	1934.18	691.446	1568	949	5107	8.96817e+07	1675	33962288		A. tropicalis	19	94088.1	5706.68	3156.8	1689	1375	27590	5.3693e+08	5319	203334534
E. coli OP50	19	58521.5	4581.02	2458.63	1574	1165	16208	2.68088e+08	4551	101524491		E. coli HT115	19	63591.5	3338.7	1390.03	1642	1278	9273	2.12313e+08	3152	80402503		KTM	19	32030.8	1838.82	442.696	1663	966	4316	5.8899e+07	1712	22304939		A. tropicalis	20	78812.1	5452.87	2493.55	1897	1360	24321	4.29752e+08	5295	162746277
E. coli OP50	20	69646.5	5560.92	2955.76	1804	1389	19615	3.87298e+08	5211	146669215		E. coli HT115	20	57262	3305.29	1392.63	1687	1304	9950	1.89267e+08	3054	71675218		KTM	20	35202.2	2198.36	733.496	1825	1177	6205	7.73871e+07	1908	29306375		A. tropicalis	21	93076.8	4877.69	2496.78	1806	1205	20283	4.53999e+08	4559	171928700
E. coli OP50	21	64536.9	4652.74	2498.66	1411	1008	15325	3.00273e+08	4588	113712861		E. coli HT115	21	62091.7	3673.8	1591.03	1620	1218	11605	2.28113e+08	3490	86385832		KTM	21	37866.6	2174.54	728.014	1809	1140	7627	8.23425e+07	1909	31182942		A. tropicalis	22	100066	5082.47	2651.57	3605	1118	22856	5.08584e+08	4583	192600012
E. coli OP50	22	52801.9	6843.28	3365.38	5972	1434	23400	3.61338e+08	6633	136838198		E. coli HT115	22	62775.6	4378.23	2186.72	1648	1231	16679	2.74846e+08	4144	104083620		KTM	22	39036.4	2002.68	609.408	1759	1266	6168	7.81772e+07	1802	29605566		A. tropicalis	23	86924.1	5276.73	2794.6	1672	1180	24675	4.58675e+08	4822	173699395
E. coli OP50	23	47008.4	7436.46	3817.86	4639	1425	27297	3.49576e+08	6911	132383923		E. coli HT115	23	65936.4	3685.94	1623.48	1667	1298	13814	2.43038e+08	3484	92037962		KTM	23	44024.5	2155.6	562.161	1816	1259	4581	9.48991e+07	1980	35938138		A. tropicalis	24	82820.6	5021.74	2570.33	3786	1144	20991	4.15903e+08	4620	157501898
E. coli OP50	24	47496.9	7638.48	4168.75	3536	1457	33145	3.62804e+08	6676	137393419		E. coli HT115	24	66916.1	4179.33	1918.57	1646	1300	13239	2.79664e+08	4041	105908360		KTM	24	36776	2134.61	645.914	1665	1255	5723	7.85026e+07	1907	29728785		A. tropicalis	25	83694.6	5110	2391.76	3482	1365	19731	4.27679e+08	4689	161961315
E. coli OP50	25	46155.5	6591.75	3465	4304	1551	29428	3.04246e+08	5924	115217257		E. coli HT115	25	56884.3	4105.73	1970.26	1651	1239	12416	2.33552e+08	3758	88445689		KTM	25	43029	2234.56	781.143	1803	1245	6508	9.61509e+07	1893	36412176		A. tropicalis	26	65572	4292.14	1705.34	3895	1398	19320	2.81444e+08	4167	106582531
E. coli OP50	26	45693.4	6522.95	3187.37	2534	1399	22511	2.98056e+08	6166	112873214		E. coli HT115	26	66380	4249.8	2005.14	1782	1315	17244	2.82102e+08	4060	106831520		KTM	26	39490.5	2254.75	716.414	1819	1223	6044	8.90414e+07	1975	33719809		A. tropicalis	27	88344.8	5463.09	2646.25	1785	1382	18992	4.82635e+08	5133	182773178
E. coli OP50	27	46139.6	6554.14	3257.5	1810	1468	32801	3.02406e+08	6109	114520439		E. coli HT115	27	58981	3974.66	1925.12	1766	1240	18840	2.34429e+08	3680	88777950		KTM	27	42316	2123.38	667.499	1644	1185	6185	8.98531e+07	1850	34027195		A. tropicalis	28	88989.1	4572.69	2224.52	1773	1244	16672	4.06919e+08	4303	154099512
E. coli OP50	28	60132.3	4052.04	2204.59	1413	975	17532	2.43658e+08	3861	92272958		E. coli HT115	28	65241.9	4465.77	2166.66	1784	1285	16744	2.91355e+08	4269	110335653		KTM	28	41249.2	2066.36	653.682	1810	1201	5930	8.52356e+07	1832	32278560		A. tropicalis	29	88262.9	4798.47	2408.27	1670	1283	18560	4.23526e+08	4477	160388693
E. coli OP50	29	55875.6	4348.2	2066.55	2192	1047	19831	2.42959e+08	4180	92008004		E. coli HT115	29	63184.9	4407.51	2069.22	1653	1285	17592	2.78488e+08	4217	105462804		KTM	29	40871.6	2234.03	772.596	1795	1223	7336	9.13082e+07	1935	34578258		A. tropicalis	30	89155.4	4810.17	2521.07	1646	1186	22148	4.28853e+08	4629	162405829
E. coli OP50	30	63227.1	4603.45	2476.82	1659	1133	21411	2.91063e+08	4408	110224950		E. coli HT115	30	64729.6	4573.31	2077.45	1621	1196	12559	2.96029e+08	4381	112105562		KTM	30	40723.7	1971.01	495.533	1772	1336	5553	8.02668e+07	1809	30396881		A. tropicalis	31	94515.9	4942.36	2563.65	1752	1216	19994	4.67132e+08	4445	176902083
E. coli OP50	31	64048.4	4253.79	2315.17	1589	1101	17427	2.72448e+08	4102	103175625		E. coli HT115	31	54468.2	4821.07	2086.27	1939	1290	15328	2.62595e+08	4677	99444291		KTM	31	46369.4	2148.05	681.025	1761	1265	5559	9.96038e+07	1881	37719770		A. tropicalis	32	84119.8	5967.57	2923.52	5146	1332	23200	5.01991e+08	5552	190102946
E. coli OP50	32	68497.8	4281.65	2279.64	1580	1117	16204	2.93284e+08	4119	111066056		E. coli HT115	32	60013.5	3865.47	1779.68	1616	1232	13854	2.3198e+08	3640	87850412		KTM	32	33802.6	2007.9	570.25	1660	1178	4897	6.78724e+07	1826	25703165		A. tropicalis	33	85875.8	5265.34	2615.01	4311	1239	23227	4.52165e+08	4873	171234101
E. coli OP50	33	60840	4593.01	2643.51	1650	1245	21198	2.79439e+08	4123	105822948		E. coli HT115	33	63324.8	3980.35	1831.12	1611	1167	13247	2.52055e+08	3764	95452799		KTM	33	34531.5	1845.42	492.695	1630	1185	4497	6.37251e+07	1688	24132577		A. tropicalis	34	88838.5	5666.19	3035.02	1875	1115	21139	5.03376e+08	5261	190627601
E. coli OP50	34	56300.8	4620.24	2351.88	1603	1172	18355	2.60123e+08	4466	98508187		E. coli HT115	34	63301.1	3386.11	1471.26	1721	1259	11093	2.14345e+08	3058	81171945		KTM	34	38764.4	1983.09	555.943	1605	1192	4901	7.68733e+07	1820	29111795		A. tropicalis	35	88355.3	4694.6	2352.07	1665	1301	17132	4.14793e+08	4525	157081368
E. coli OP50	35	55326.4	5125.19	2609.95	1813	1261	16906	2.83558e+08	4776	107383031		E. coli HT115	35	69395.6	3588.51	1588.59	1582	1227	11515	2.49027e+08	3402	94306017		KTM	35	33599.3	2008.82	571.51	1660	1178	4897	6.74948e+07	1824	25560164		A. tropicalis	36	91413.2	5238.08	2462.29	1787	1364	22899	4.78829e+08	4913	181331872
E. coli OP50	36	60240.6	4929.6	2574.51	1657	1257	16881	2.96962e+08	4746	112458869		E. coli HT115	36	59493.3	3422.82	1516.4	1618	873	9935	2.03635e+08	3166	77116077		KTM	36	38640.3	1995.02	607.426	1663	1207	6148	7.70881e+07	1797	29193144		A. tropicalis	37	76005.1	5527.4	2410.08	4921	1463	20984	4.2011e+08	5168	159095071
E. coli OP50	37	68843.7	5268.02	2895.14	1466	1045	20579	3.6267e+08	5071	137342436		E. coli HT115	37	67206.5	3882.45	1588.87	1779	1233	11815	2.60926e+08	3843	98812294		KTM	37	44587	2136.38	672.301	1783	1215	5959	9.52547e+07	1888	36072767		A. tropicalis	38	88569.2	5142.83	2663.16	1768	1357	17764	4.55497e+08	4739	172495792
E. coli OP50	38	58804.1	4842.96	2698.38	1578	983	19335	2.84786e+08	4657	107847868		E. coli HT115	38	68178.3	3323.71	1524.83	1578	1138	9600	2.26605e+08	2991	85814874		KTM	38	45125.6	2241.37	740.812	1797	1141	6077	1.01143e+08	1963	38302818		A. tropicalis	39	75690.9	4954.67	2190.74	1814	1444	16492	3.75023e+08	4850	142020651
E. coli OP50	39	59382.4	4504.16	2478.04	1430	1052	19193	2.67468e+08	4340	101289668		E. coli HT115	39	64758.7	3787.27	1647.57	1638	1253	11538	2.45259e+08	3661	92879033		KTM	39	33343.2	2026.41	600.231	1782	1173	6209	6.75669e+07	1822	25587481		A. tropicalis	40	88194.2	5157.55	2599.69	1805	1314	24619	4.54866e+08	4776	172256980
E. coli OP50	40	66752.4	5573.91	3095.44	1550	1169	27480	3.72072e+08	5285	140902993		E. coli HT115	40	58777.7	3729.9	1753.42	1625	1288	12253	2.19235e+08	3450	83023756		KTM	40	25334.2	2023.35	604.468	1789	1198	5851	5.12598e+07	1846	19411977		A. tropicalis	41	88611.5	4709.37	2179.36	1777	1362	12665	4.17304e+08	4744	158032182

## Sheet: F2D Summary Statistics PRISM
Table Analyzed	REP2_Normalized							Number of families	1
Data sets analyzed	A-D							Number of comparisons per family	6
								Alpha	0.05
ANOVA summary
F	294.9							Tukey's multiple comparisons test	Mean Diff.	95.00% CI of diff.	Below threshold?	Summary	Adjusted P Value
P value	<0.0001							O vs. H	0.2498	0.1903 to 0.3093	Yes	****	<0.0001	A-B
P value summary	****							O vs. K	0.611	0.5515 to 0.6705	Yes	****	<0.0001	A-C
Significant diff. among means (P < 0.05)?	Yes							O vs. A	0.04581	-0.01370 to 0.1053	No	ns	0.1927	A-D
R squared	0.8501							H vs. K	0.3612	0.3017 to 0.4207	Yes	****	<0.0001	B-C
								H vs. A	-0.204	-0.2635 to -0.1445	Yes	****	<0.0001	B-D
Brown-Forsythe test								K vs. A	-0.5652	-0.6247 to -0.5057	Yes	****	<0.0001	C-D
F (DFn, DFd)	10.65 (3, 156)
P value	<0.0001							Test details	Mean 1	Mean 2	Mean Diff.	SE of diff.	n1	n2	q	DF
P value summary	****							O vs. H	0.9999	0.7501	0.2498	0.02292	40	40	15.42	156
Are SDs significantly different (P < 0.05)?	Yes							O vs. K	0.9999	0.389	0.611	0.02292	40	40	37.71	156
								O vs. A	0.9999	0.9541	0.04581	0.02292	40	40	2.827	156
Bartlett's test								H vs. K	0.7501	0.389	0.3612	0.02292	40	40	22.29	156
Bartlett's statistic (corrected)	82.06							H vs. A	0.7501	0.9541	-0.204	0.02292	40	40	12.59	156
P value	<0.0001							K vs. A	0.389	0.9541	-0.5652	0.02292	40	40	34.88	156
P value summary	****
Are SDs significantly different (P < 0.05)?	Yes
ANOVA table	SS	DF	MS	F (DFn, DFd)	P value
Treatment (between columns)	9.293	3	3.098	F (3, 156) = 294.9	P<0.0001
Residual (within columns)	1.638	156	0.0105
Total	10.93	159
Data summary
Number of treatments (columns)	4
Number of values (total)	160

## Sheet: F2E
Biological Replicate	Technical Replicate	Food	nmol per worm	average per replicate
1	1	OP50	0.0185276
1	2	OP50	0.0180887
1	3	OP50	0.0176497	0.0180887
2	1	OP50	0.0358285
2	2	OP50	0.0311254
2	3	OP50	0.0293617	0.0321052
3	1	OP50	0.026124
3	2	OP50	0.000152355
3	3	OP50	0.0394756	0.0327998
1	1	HT115	0.00803228
1	2	HT115	0.00876388
1	3	HT115	0.00967837	0.00882484
2	1	HT115	0.0131157
2	2	HT115	0.0128269
2	3	HT115	0.0138377	0.0132601
3	1	HT115	0.0184803
3	2	HT115	0.018709
3	3	HT115	0.0120789	0.0185947
1	1	Kombucha	0.00604213
1	2	Kombucha	0.00643406
1	3	Kombucha	0.00545424	0.00597681
2	1	Kombucha	0.00471792
2	2	Kombucha	0.00509203
2	3	Kombucha	0.000976805	0.00359559
3	1	Kombucha	0.000963453
3	2	Kombucha	0.00213923
3	3	Kombucha	0.000571527	0.00155134
1	1	Acetobacter	0.0337505
1	2	Acetobacter	0.0330646
1	3	Acetobacter	0.0301497	0.0323216
2	1	Acetobacter	0.0488422
2	2	Acetobacter	0.0503387
2	3	Acetobacter	0.052334	0.050505
3	1	Acetobacter	0.0566478
3	2	Acetobacter	0.0447593
3	3	Acetobacter	0.0535995	0.0551236

## Sheet: F2E Summary Statistics PRISM
Table Analyzed	ALL REPS						Number of families	1
Data sets analyzed	A-D						Number of comparisons per family	6
							Alpha	0.05
ANOVA summary
F	16.64						Tukey's multiple comparisons test	Mean Diff.	95.00% CI of diff.	Below threshold?	Summary	Adjusted P Value
P value	0.0008						op50 vs. HT115	0.0141	-0.006277 to 0.03449	No	ns	0.1984	A-B
P value summary	***						op50 vs. Kombucha	0.02396	0.003575 to 0.04434	Yes	*	0.0229	A-C
Significant diff. among means (P < 0.05)?	Yes						op50 vs. Acetobacter	-0.01832	-0.03870 to 0.002063	No	ns	0.079	A-D
R squared	0.8619						HT115 vs. Kombucha	0.009852	-0.01053 to 0.03023	No	ns	0.4556	B-C
							HT115 vs. Acetobacter	-0.03242	-0.05281 to -0.01204	Yes	**	0.0041	B-D
Brown-Forsythe test							Kombucha vs. Acetobacter	-0.04228	-0.06266 to -0.02189	Yes	***	0.0007	C-D
F (DFn, DFd)	0.5033 (3, 8)
P value	0.6906						Test details	Mean 1	Mean 2	Mean Diff.	SE of diff.	n1	n2	q	DF
P value summary	ns						op50 vs. HT115	0.02766	0.01356	0.0141	0.006365	3	3	3.134	8
Are SDs significantly different (P < 0.05)?	No						op50 vs. Kombucha	0.02766	0.003708	0.02396	0.006365	3	3	5.323	8
							op50 vs. Acetobacter	0.02766	0.04598	-0.01832	0.006365	3	3	4.07	8
Bartlett's test							HT115 vs. Kombucha	0.01356	0.003708	0.009852	0.006365	3	3	2.189	8
Bartlett's statistic (corrected)							HT115 vs. Acetobacter	0.01356	0.04598	-0.03242	0.006365	3	3	7.205	8
P value							Kombucha vs. Acetobacter	0.003708	0.04598	-0.04228	0.006365	3	3	9.394	8
P value summary
Are SDs significantly different (P < 0.05)?
ANOVA table	SS	DF	MS	F (DFn, DFd)	P value
Treatment (between columns)	0.003033	3	0.001011	F (3, 8) = 16.64	P=0.0008
Residual (within columns)	0.0004861	8	6.076e-05
Total	0.003519	11
Data summary
Number of treatments (columns)	4
Number of values (total)	12

## Sheet: F2G
Food	Worm	Average LD Size Pixles	Average LD Size um
E. coli Op50	1	17.8606	1.94019
E. coli Op50	2	15.7602	1.71202
E. coli Op50	3	14.6498	1.59141
E. coli Op50	4	14.6559	1.59207
E. coli Op50	5	14.3795	1.56204
E. coli Op50	6	13.5048	1.46702
E. coli Op50	7	13.8002	1.49911
E. coli Op50	8	15.1545	1.64623
E. coli Op50	9	12.74	1.38394
E. coli Op50	10	15.2227	1.65363
E. coli HT115	1	9.375	1.0184
E. coli HT115	2	9.72489	1.05641
E. coli HT115	3	9.29683	1.00991
E. coli HT115	4	9.07165	0.985449
E. coli HT115	5	9.02628	0.98052
E. coli HT115	6	9.899	1.07532
E. coli HT115	7	9.39496	1.02057
E. coli HT115	8	8.75326	0.950862
E. coli HT115	9	8.24234	0.895362
E. coli HT115	10	8.88748	0.965443
KTM	1	5.2578	0.571152
KTM	2	5.1997	0.564841
KTM	3	6.15243	0.668336
KTM	4	5.03351	0.546788
KTM	5	6.60002	0.716957
KTM	6	4.42258	0.480423
KTM	7	4.26223	0.463004
KTM	8	6.59372	0.716273
KTM	9	5.24396	0.569648
KTM	10	5.46617	0.593787
A. tropicalis	1	13.2432	1.4386
A. tropicalis	2	13.0377	1.41628
A. tropicalis	3	13.2246	1.43658
A. tropicalis	4	13.6118	1.47864
A. tropicalis	5	12.3757	1.34437
A. tropicalis	6	15.0681	1.63684
A. tropicalis	7	12.7713	1.38734
A. tropicalis	8	13.7587	1.4946
A. tropicalis	9	17.7311	1.92612
A. tropicalis	10	12.2585	1.33163

## Sheet: F2G Summary Statistics PRISM
Table Analyzed	OHAK								Number of families	1
Data sets analyzed	A-D								Number of comparisons per family	6
									Alpha	0.05
ANOVA summary
F	135.5								Tukey's multiple comparisons test	Mean Diff.	95.00% CI of diff.	Below threshold?	Summary	Adjusted P Value
P value	<0.0001								OP50 vs. HT115	0.6089	0.4556 to 0.7622	Yes	****	<0.0001	A-B
P value summary	****								OP50 vs. KTM	1.016	0.8623 to 1.169	Yes	****	<0.0001	A-C
Significant diff. among means (P < 0.05)?	Yes								OP50 vs. A	0.1157	-0.03763 to 0.2690	No	ns	0.1953	A-D
R squared	0.9187								HT115 vs. KTM	0.4067	0.2534 to 0.5600	Yes	****	<0.0001	B-C
									HT115 vs. A	-0.4933	-0.6466 to -0.3400	Yes	****	<0.0001	B-D
Brown-Forsythe test									KTM vs. A	-0.9	-1.053 to -0.7467	Yes	****	<0.0001	C-D
F (DFn, DFd)	1.091 (3, 36)
P value	0.3652								Test details	Mean 1	Mean 2	Mean Diff.	SE of diff.	n1	n2	q	DF
P value summary	ns								OP50 vs. HT115	1.605	0.9958	0.6089	0.05692	10	10	15.13	36
Are SDs significantly different (P < 0.05)?	No								OP50 vs. KTM	1.605	0.5891	1.016	0.05692	10	10	25.23	36
									OP50 vs. A	1.605	1.489	0.1157	0.05692	10	10	2.874	36
Bartlett's test									HT115 vs. KTM	0.9958	0.5891	0.4067	0.05692	10	10	10.11	36
Bartlett's statistic (corrected)	12.92								HT115 vs. A	0.9958	1.489	-0.4933	0.05692	10	10	12.26	36
P value	0.0048								KTM vs. A	0.5891	1.489	-0.9	0.05692	10	10	22.36	36
P value summary	**
Are SDs significantly different (P < 0.05)?	Yes
ANOVA table	SS	DF	MS	F (DFn, DFd)	P value
Treatment (between columns)	6.586	3	2.195	F (3, 36) = 135.5	P<0.0001
Residual (within columns)	0.5831	36	0.0162
Total	7.169	39
Data summary
Number of treatments (columns)	4
Number of values (total)	40

## Sheet: F2H
food	worm	area	mean	StdDev	Mode	Min	Max	IntDen	Median	RawIntDen		LD#	LD/Area
E. coli OP50	1	992.203	10509.7	2028.41	9281	4934	18059	1.04278e+07	10471	883690103		94	0.0947387
E. coli OP50	2	1150.16	15472	3488.07	13291	7124	35688	1.77954e+07	14942	1508044808		111	0.0965081
E. coli OP50	3	996.794	20269.1	4518.08	17962	8509	38265	2.02041e+07	19997	1712169488		122	0.122392
E. coli OP50	4	1333.97	19748.4	4791.76	20962	7988	42502	2.63439e+07	19618	2232481790		108	0.080961
E. coli OP50	5	1337.73	25760.1	7314.56	21969	10273	65535	3.446e+07	24273	2920265752		158	0.118111
E. coli OP50	6	1653.52	26378.4	5690.73	27212	10212	50581	4.36171e+07	26655	3696275889		173	0.104626
E. coli OP50	7	1776.03	23621.3	6154.34	22286	7898	48071	4.19521e+07	23257	3555173394		161	0.0906519
E. coli OP50	8	1357.74	13844.7	2743.54	13441	5418	30069	1.87975e+07	13552	1592968917		141	0.103849
E. coli OP50	9	1578.06	20100.8	4065.52	18106	9454	42064	3.17204e+07	19731	2688103918		130	0.0823794
E. coli OP50	10	1764.14	22229.9	6089.31	19505	7004	48557	3.92167e+07	21658	3323366236		159	0.0901288
													0.0984346
E. coli HT115	1	2211.2	16313	4667.14	65535	6439	65535	3.60713e+07	15289	3056818030		151	0.0682888
E. coli HT115	2	589.412	32948	6457.16	32706	17954	54902	1.942e+07	33129	1645719831		49	0.0831337
E. coli HT115	3	1007.66	8827.07	1976.85	9272	4585	34820	8.8947e+06	8838	753770133		75	0.0744297
E. coli HT115	4	1595.65	42311.6	10351.8	65535	12659	65535	6.75143e+07	41395	5721412416		156	0.097766
E. coli HT115	5	885.788	32059.9	7052.46	65535	15747	65535	2.83983e+07	30773	2406577967		72	0.0812836
E. coli HT115	6	1525.54	40753.7	9621.08	65535	16971	65535	6.21715e+07	39155	5268640895		159	0.104225
E. coli HT115	7	1423.14	29657.4	9264.12	65535	13915	65535	4.22066e+07	27402	3576741934		95	0.0667539
E. coli HT115	8	2053.43	29350	9769.92	65535	7319	65535	6.02681e+07	28893	5107345973		229	0.111521
E. coli HT115	9	1333.2	23688.3	6193.35	65535	11296	65535	3.15811e+07	22712	2676303564		108	0.0810083
E. coli HT115	10	1958.88	25061.3	5734.69	25555	11158	65535	4.90921e+07	25238	4160243447		94	0.0479866
													0.0816397
A. tropicalis	1	1528.97	19808.2	5961.81	65535	5775	65535	3.02863e+07	18611	2566571282		105	0.0686735
A. tropicalis	2	2478.97	24670.7	7545.23	65535	8873	65535	6.1158e+07	23110	5182755661		150	0.0605091
A. tropicalis	3	1290.08	19002.8	5710.78	17043	7894	65535	2.4515e+07	18304	2077496617		89	0.0689881
A. tropicalis	4	2474.91	11934.7	3192.43	10932	4789	41586	2.95373e+07	11266	2503102833		180	0.0727299
A. tropicalis	5	1443.54	13747.5	5093.11	65535	4381	65535	1.98451e+07	12594	1681746119		110	0.0762015
A. tropicalis	6	998.847	31770.5	7763.7	65535	11084	65535	3.17339e+07	30618	2689249842		90	0.0901039
A. tropicalis	7	2535.04	10653.1	3450.97	9404	4238	51333	2.7006e+07	9905	2288590359		134	0.0528591
A. tropicalis	8	1817.5	16219	2609.11	15454	8836	42954	2.94781e+07	16101	2498083917		102	0.056121
A. tropicalis	9	1794.38	23596.9	5554.06	20280	10649	51730	4.23416e+07	22511	3588187588		131	0.0730059
A. tropicalis	10	1075.08	36868	10273.1	65535	11961	65535	3.96359e+07	34178	3358895849		77	0.0716228
													0.0690815
KTM	1	1569.06	19252.4	4858.24	65535	8877	65535	3.02081e+07	18332	2559949959		64	0.0407888
KTM	2	1195.11	16266.1	4973.29	65535	8856	65535	1.94397e+07	15571	1647393516		79	0.0661028
KTM	3	1414.78	24975.1	6177.84	65535	14147	65535	3.53343e+07	24268	2994363429		59	0.0417025
KTM	4	1016.82	13311.7	3241.92	65535	7667	65535	1.35356e+07	12993	1147054863		84	0.0826106
KTM	5	1270.72	24994.4	4771.93	65535	14333	65535	3.1761e+07	24703	2691547216		60	0.0472171
KTM	6	1068.29	13171	3033.95	13976	5043	44061	1.40704e+07	13007	1192379657		84	0.0786303
KTM	7	1658.87	19068	4660.49	65535	10312	65535	3.16313e+07	18381	2680556446		82	0.0494312
KTM	8	1942.1	15501	3848.44	65535	7311	65535	3.01045e+07	14884	2551165348		83	0.0427372
KTM	9	1323.07	9844.56	3236.08	65535	4647	65535	1.30251e+07	9463	1103791413		82	0.061977
KTM	10	1587.23	29084.6	8836.47	65535	10511	65535	4.6164e+07	28529	3912106882		125	0.0787534
													0.0589951

## Sheet: F2H Summary Statistics
								Number of families	1
Table Analyzed	OHAK							Number of comparisons per family	6
Data sets analyzed	A-D							Alpha	0.05
ANOVA summary								Tukey's multiple comparisons test	Mean Diff.	95.00% CI of diff.	Below threshold?	Summary	Adjusted P Value
F	12.2							OP50 vs. HT115	0.01679	-0.001756 to 0.03535	No	ns	0.0878	A-B
P value	<0.0001							OP50 vs. Acetobacter	0.02935	0.01080 to 0.04790	Yes	***	0.0008	A-C
P value summary	****							OP50 vs. KTM	0.03944	0.02089 to 0.05799	Yes	****	<0.0001	A-D
Significant diff. among means (P < 0.05)?	Yes							HT115 vs. Acetobacter	0.01256	-0.005992 to 0.03111	No	ns	0.2793	B-C
R squared	0.504							HT115 vs. KTM	0.02264	0.004094 to 0.04120	Yes	*	0.0116	B-D
								Acetobacter vs. KTM	0.01009	-0.008464 to 0.02864	No	ns	0.469	C-D
Brown-Forsythe test
F (DFn, DFd)	1.267 (3, 36)							Test details	Mean 1	Mean 2	Mean Diff.	SE of diff.	n1	n2	q	DF
P value	0.3003							OP50 vs. HT115	0.09843	0.08164	0.01679	0.006888	10	10	3.448	36
P value summary	ns							OP50 vs. Acetobacter	0.09843	0.06908	0.02935	0.006888	10	10	6.027	36
Are SDs significantly different (P < 0.05)?	No							OP50 vs. KTM	0.09843	0.059	0.03944	0.006888	10	10	8.098	36
								HT115 vs. Acetobacter	0.08164	0.06908	0.01256	0.006888	10	10	2.578	36
Bartlett's test								HT115 vs. KTM	0.08164	0.059	0.02264	0.006888	10	10	4.649	36
Bartlett's statistic (corrected)	2.978							Acetobacter vs. KTM	0.06908	0.059	0.01009	0.006888	10	10	2.071	36
P value	0.395
P value summary	ns
Are SDs significantly different (P < 0.05)?	No
ANOVA table	SS	DF	MS	F (DFn, DFd)	P value
Treatment (between columns)	0.008678	3	0.002893	F (3, 36) = 12.20	P<0.0001
Residual (within columns)	0.00854	36	0.0002372
Total	0.01722	39
Data summary
Number of treatments (columns)	4
Number of values (total)	40
